# Supplementary material
Source: publisher site journal article supplement (https://neobiota.pensoft.net/article/90473/download/suppl/37/)

**Supplementary material 7** for the article by Andrey N. Reshetnikov et al. “Rarely naturalized, but widespread and even invasive: the paradox of a popular pet terrapin expansion in Eurasia”.

Journal: NeoBiota.

Corresponding author: Andrey N. Reshetnikov

e-mail: anreshetnikov@yandex.ru

**Figure S3.** Evaluation metrics for MaxEnt models made across a range of feature-class combinations and regularization multipliers. Legends denote feature classes allowed (L = linear, Q = quadratic, H = hinge, P = product and T = threshold). Note that for this species selected regularization multipliers higher than the default value. Optimal parameters (OP) of MaxEnt models (a, b) (feature classes combinations and regularization multipliers) are indicated by black arrow, where **a**, **b** are OP for creation SDM for: **a** potential range of successful reproduction; **b** potential range of successful reproduction and wintering

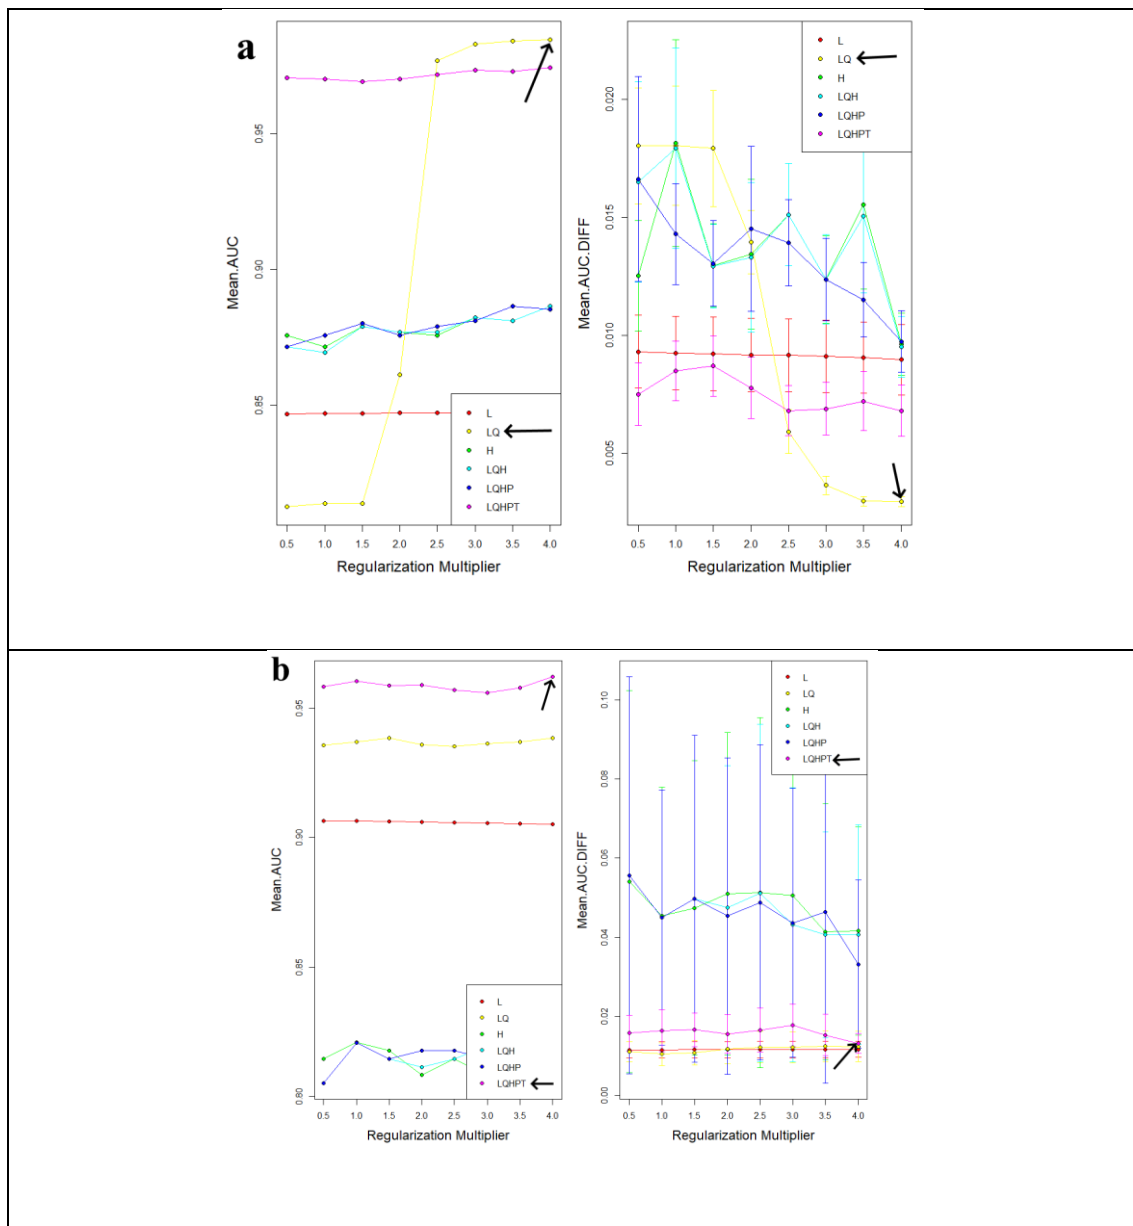

Supplement: Supplementary file 1
